# Supplementary material for: Characterizing the Influence of Domestic Cats on Birds with Wildlife Rehabilitation Center Data
Source: MDPI journal article supplement (doi:10.3390/d13070322), 2021-07-15
Supplement: s1 [file s1]

Demezas and Robinson, Characterizing the influence of domestic cats on birds with wildlife rehabilitation center data

Supplementary material

Tables

**Table S1.** Percentages and total numbers (N) of admissions for each species at each wildlife rehabilitation center, Turtle Ridge, Salem, Oregon USA, and Wildlife Images, Grants Pass, Oregon USA.

| Species                |                                  | Percent (N) Total Admissions for Center |                 |            |
|------------------------|----------------------------------|-----------------------------------------|-----------------|------------|
| Common Name            | Scientific Name                  | Turtle Ridge                            | Wildlife Images | Total      |
| Cackling Goose         | <i>Branta hutchinsii</i>         | 1.06 (35)                               | 0.00 (0)        | 0.55 (35)  |
| Canada Goose           | <i>Branta canadensis</i>         | 1.58 (52)                               | 4.19 (128)      | 2.84 (180) |
| Wood Duck              | <i>Aix sponsa</i>                | 0.06 (2)                                | 0.66 (20)       | 0.35 (22)  |
| American Wigeon        | <i>Mareca americana</i>          | 0.03 (1)                                | 0.00 (0)        | 0.02 (1)   |
| Mallard                | <i>Anas platyrhynchos</i>        | 10.96 (361)                             | 3.70 (113)      | 7.47 (474) |
| Ring-necked Duck       | <i>Aythya collaris</i>           | 0.09 (3)                                | 0.10 (3)        | 0.09 (6)   |
| Lesser Scaup           | <i>Aythya affinis</i>            | 0.09 (3)                                | 0.03 (1)        | 0.06 (4)   |
| Harlequin Duck         | <i>Histrionicus histrionicus</i> | 0.03 (1)                                | 0.00 (0)        | 0.02 (1)   |
| Bufflehead             | <i>Bucephala albeola</i>         | 0.00 (0)                                | 0.03 (1)        | 0.02 (1)   |
| Common Merganser       | <i>Mergus merganser</i>          | 0.00 (0)                                | 0.03 (1)        | 0.02 (1)   |
| Ruddy Duck             | <i>Oxyura jamaicensis</i>        | 0.03 (1)                                | 0.00 (0)        | 0.02 (1)   |
| Mountain Quail         | <i>Oreortyx pictus</i>           | 0.67 (22)                               | 0.07 (2)        | 0.36 (24)  |
| California Quail       | <i>Callipepla californica</i>    | 0.27 (9)                                | 1.97 (60)       | 1.09 (69)  |
| Wild Turkey            | <i>Meleagris gallopavo</i>       | 0.18 (6)                                | 3.37 (103)      | 1.72 (109) |
| Ruffed Grouse          | <i>Bonasa umbellus</i>           | 0.03 (1)                                | 0.03 (1)        | 0.03 (2)   |
| Sooty Grouse           | <i>Dendragapus fuliginosus</i>   | 0.00 (0)                                | 0.03 (1)        | 0.02 (1)   |
| Ring-necked Pheasant   | <i>Phasianus colchicus</i>       | 0.12 (4)                                | 0.07 (2)        | 0.09 (6)   |
| Common Quail           | <i>Coturnix coturnix</i>         | 0.00 (0)                                | 0.03 (1)        | 0.02 (1)   |
| Pied-billed Grebe      | <i>Podilymbus podiceps</i>       | 0.03 (1)                                | 0.00 (0)        | 0.02 (1)   |
| Horned Grebe           | <i>Podiceps auritus</i>          | 0.00 (0)                                | 0.07 (2)        | 0.03 (2)   |
| Eared Grebe            | <i>Podiceps nigricollis</i>      | 0.00 (0)                                | 0.03 (1)        | 0.02 (1)   |
| Western Grebe          | <i>Aechmophorus occidentalis</i> | 0.12 (4)                                | 0.20 (6)        | 0.16 (10)  |
| Rock Pigeon            | <i>Columba livia</i>             | 4.34 (143)                              | 2.98 (91)       | 3.69 (234) |
| Eurasian Collared-Dove | <i>Streptopelia decaocto</i>     | 3.60 (118)                              | 3.60 (110)      | 3.60 (228) |
| Mourning Dove          | <i>Zenaida macroura</i>          | 3.4 (114)                               | 4.78 (146)      | 4.20 (260) |
| Common Nighthawk       | <i>Chordeiles minor</i>          | 0.00 (0)                                | 0.16 (5)        | 0.08 (5)   |
| Common Poorwill        | <i>Phalaenoptilus nuttallii</i>  | 0.03 (1)                                | 0.10 (3)        | 0.06 (4)   |
| Vaux's Swift           | <i>Chaetura vauxi</i>            | 2.95 (97)                               | 0.79 (24)       | 1.91 (121) |
| Anna's Hummingbird     | <i>Calypte anna</i>              | 1.88 (62)                               | 0.66 (20)       | 1.29 (82)  |
| Rufous Hummingbird     | <i>Selasphorus rufus</i>         | 0.33 (11)                               | 1.28 (39)       | 0.79 (50)  |
| Sora                   | <i>Porzana carolina</i>          | 0.00 (0)                                | 0.03 (1)        | 0.02 (1)   |
| Virginia Rail          | <i>Rallus limicola</i>           | 0.00 (0)                                | 0.10 (3)        | 0.05 (3)   |
| American Coot          | <i>Fulica americana</i>          | 0.03 (1)                                | 0.07 (2)        | 0.05 (3)   |
| Killdeer               | <i>Charadrius vociferus</i>      | 0.62 (21)                               | 0.26 (8)        | 0.45 (29)  |
| Wilson's Snipe         | <i>Gallinago delicata</i>        | 0.06 (2)                                | 0.16 (5)        | 0.11 (7)   |
| Spotted Sandpiper      | <i>Actitis macularius</i>        | 0.00 (0)                                | 0.06 (2)        | 0.04 (2)   |

|                                 |                                  |            |            |            |
|---------------------------------|----------------------------------|------------|------------|------------|
| <b>Common Murre</b>             | <i>Uria aalge</i>                | 0.15 (5)   | 0.07 (2)   | 0.11 (7)   |
| <b>Mew Gull</b>                 | <i>Larus canus</i>               | 0.03 (1)   | 0.00 (0)   | 0.02 (1)   |
| <b>Western Gull</b>             | <i>Larus occidentalis</i>        | 0.46 (15)  | 0.07 (2)   | 0.27 (17)  |
| <b>California Gull</b>          | <i>Larus californicus</i>        | 0.03 (1)   | 0.03 (1)   | 0.03 (2)   |
| <b>Herring Gull</b>             | <i>Larus argentatus</i>          | 0.00 (0)   | 0.03 (1)   | 0.02 (1)   |
| <b>Leach's Storm-Petrel</b>     | <i>Hydrobates leucorhous</i>     | 0.00 (0)   | 0.03 (1)   | 0.02 (1)   |
| <b>Double-crested Cormorant</b> | <i>Phalacrocorax auritus</i>     | 0.06 (2)   | 0.03 (1)   | 0.05 (3)   |
| <b>American White Pelican</b>   | <i>Pelecanus erythrorhynchos</i> | 0.00 (0)   | 0.07 (2)   | 0.03 (2)   |
| <b>Great Blue Heron</b>         | <i>Ardea herodias</i>            | 0.30 (10)  | 0.26 (8)   | 0.28 (18)  |
| <b>Great Egret</b>              | <i>Ardea alba</i>                | 0.00 (0)   | 0.07 (2)   | 0.03 (2)   |
| <b>Green Heron</b>              | <i>Butorides virescens</i>       | 0.49 (16)  | 1.61 (49)  | 1.02 (65)  |
| <b>Turkey Vulture</b>           | <i>Cathartes aura</i>            | 0.27 (9)   | 0.92 (28)  | 0.58 (37)  |
| <b>Osprey</b>                   | <i>Pandion haliaetus</i>         | 0.15 (5)   | 0.46 (14)  | 0.30 (19)  |
| <b>Golden Eagle</b>             | <i>Aquila chrysaetos</i>         | 0.00 (0)   | 0.13 (4)   | 0.06 (4)   |
| <b>Northern Harrier</b>         | <i>Circus hudsonius</i>          | 0.03 (1)   | 0.00 (0)   | 0.02 (1)   |
| <b>Sharp-shinned Hawk</b>       | <i>Accipiter striatus</i>        | 0.39 (13)  | 0.46 (14)  | 0.43 (27)  |
| <b>Cooper's Hawk</b>            | <i>Accipiter cooperii</i>        | 0.46 (15)  | 1.11 (34)  | 0.77 (49)  |
| <b>Bald Eagle</b>               | <i>Haliaeetus leucocephalus</i>  | 0.24 (8)   | 0.26 (8)   | 0.25 (16)  |
| <b>Red-shouldered Hawk</b>      | <i>Buteo lineatus</i>            | 0.03 (1)   | 1.02 (31)  | 0.50 (32)  |
| <b>Swainson's Hawk</b>          | <i>Buteo swainsoni</i>           | 0.06 (2)   | 0.00 (0)   | 0.03 (2)   |
| <b>Red-tailed Hawk</b>          | <i>Buteo jamaicensis</i>         | 3.13 (103) | 3.80 (116) | 3.45 (219) |
| <b>Rough-legged Hawk</b>        | <i>Buteo lagopus</i>             | 0.03 (1)   | 0.03 (1)   | 0.03 (2)   |
| <b>Barn Owl</b>                 | <i>Tyto alba</i>                 | 2.34 (77)  | 3.15 (96)  | 2.73 (173) |
| <b>Flammulated Owl</b>          | <i>Psilosops flammeulus</i>      | 0.00 (0)   | 0.07 (2)   | 0.03 (2)   |
| <b>Western Screech-Owl</b>      | <i>Megascops kennicottii</i>     | 0.43 (14)  | 4.78 (146) | 2.52 (160) |
| <b>Great Horned Owl</b>         | <i>Bubo virginianus</i>          | 2.67 (88)  | 1.25 (38)  | 1.99 (126) |
| <b>Northern Pygmy-Owl</b>       | <i>Glaucidium gnoma</i>          | 0.18 (6)   | 0.66 (20)  | 0.41 (26)  |
| <b>Spotted Owl</b>              | <i>Strix occidentalis</i>        | 0.00 (0)   | 0.13 (4)   | 0.06 (4)   |
| <b>Barred Owl</b>               | <i>Strix varia</i>               | 0.88 (29)  | 1.08 (33)  | 0.98 (62)  |
| <b>Great Gray Owl</b>           | <i>Strix nebulosa</i>            | 0.00 (0)   | 0.16 (5)   | 0.08 (5)   |
| <b>Long-eared Owl</b>           | <i>Asio otus</i>                 | 0.00 (0)   | 0.03 (1)   | 0.02 (1)   |
| <b>Northern Saw-whet Owl</b>    | <i>Aegolius acadicus</i>         | 0.09 (3)   | 0.26 (8)   | 0.17 (11)  |
| <b>Belted Kingfisher</b>        | <i>Megaceryle alcyon</i>         | 0.12 (4)   | 0.13 (4)   | 0.13 (8)   |
| <b>Acorn Woodpecker</b>         | <i>Melanerpes formicivorus</i>   | 0.24 (8)   | 1.80 (55)  | 0.99 (63)  |
| <b>Red-breasted Sapsucker</b>   | <i>Sphyrapicus ruber</i>         | 0.39 (13)  | 0.26 (8)   | 0.33 (21)  |
| <b>Downy Woodpecker</b>         | <i>Dryobates pubescens</i>       | 0.06 (2)   | 0.13 (4)   | 0.09 (6)   |
| <b>Hairy Woodpecker</b>         | <i>Dryobates villosus</i>        | 0.00 (0)   | 0.26 (8)   | 0.13 (8)   |
| <b>Northern Flicker</b>         | <i>Colaptes auratus</i>          | 1.09 (36)  | 1.54 (47)  | 1.31 (83)  |
| <b>Pileated Woodpecker</b>      | <i>Dryocopus pileatus</i>        | 0.03 (1)   | 0.10 (3)   | 0.06 (4)   |
| <b>American Kestrel</b>         | <i>Falco sparverius</i>          | 1.31 (43)  | 0.85 (26)  | 1.09 (69)  |
| <b>Merlin</b>                   | <i>Falco columbarius</i>         | 0.06 (2)   | 0.20 (6)   | 0.13 (8)   |
| <b>Peregrine Falcon</b>         | <i>Falco peregrinus</i>          | 0.15 (5)   | 0.29 (9)   | 0.22 (14)  |
| <b>Prairie Falcon</b>           | <i>Falco mexicanus</i>           | 0.06 (2)   | 0.13 (4)   | 0.09 (6)   |
| <b>Ash-throated Flycatcher</b>  | <i>Myiarchus cinerascens</i>     | 0.00 (0)   | 0.13 (4)   | 0.06 (4)   |
| <b>Western Kingbird</b>         | <i>Tyrannus verticalis</i>       | 0.00 (0)   | 0.13 (4)   | 0.06 (4)   |
| <b>Western Wood-Pewee</b>       | <i>Contopus sordidulus</i>       | 0.03 (1)   | 0.00 (0)   | 0.02 (1)   |
| <b>Pacific-slope Flycatcher</b> | <i>Empidonax difficilis</i>      | 0.18 (6)   | 0.00 (0)   | 0.09 (6)   |

|                                  |                                   |            |            |            |
|----------------------------------|-----------------------------------|------------|------------|------------|
| <b>Black Phoebe</b>              | <i>Sayornis nigricans</i>         | 0.03 (1)   | 0.00 (0)   | 0.02 (1)   |
| <b>Warbling Vireo</b>            | <i>Vireo gilvus</i>               | 0.03 (1)   | 0.00 (0)   | 0.02 (1)   |
| <b>Steller's Jay</b>             | <i>Cyanocitta stelleri</i>        | 0.70 (23)  | 1.34 (41)  | 1.01 (64)  |
| <b>California Scrub-Jay</b>      | <i>Aphelocoma californica</i>     | 5.16 (170) | 4.72 (144) | 4.95 (314) |
| <b>American Crow</b>             | <i>Corvus brachyrhynchos</i>      | 6.50 (214) | 3.80 (116) | 5.20 (330) |
| <b>Common Raven</b>              | <i>Corvus corax</i>               | 0.06 (2)   | 1.18 (36)  | 0.60 (38)  |
| <b>Horned Lark</b>               | <i>Eremophila alpestris</i>       | 0.03 (1)   | 0.00 (0)   | 0.02 (1)   |
| <b>Tree Swallow</b>              | <i>Tachycineta bicolor</i>        | 0.24 (8)   | 1.34 (41)  | 0.77 (49)  |
| <b>Violet-green Swallow</b>      | <i>Tachycineta thalassina</i>     | 1.55 (51)  | 0.16 (5)   | 0.88 (56)  |
| <b>Barn Swallow</b>              | <i>Hirundo rustica</i>            | 2.64 (87)  | 0.39 (12)  | 1.56 (99)  |
| <b>Cliff Swallow</b>             | <i>Petrochelidon pyrrhonota</i>   | 0.67 (22)  | 0.29 (9)   | 0.49 (31)  |
| <b>Black-capped Chickadee</b>    | <i>Poecile atricapillus</i>       | 0.91 (30)  | 0.52 (16)  | 0.72 (46)  |
| <b>Chestnut-backed Chickadee</b> | <i>Poecile rufescens</i>          | 0.03 (1)   | 0.00 (0)   | 0.02 (1)   |
| <b>Oak Titmouse</b>              | <i>Baeolophus inornatus</i>       | 0.00 (0)   | 0.29 (9)   | 0.14 (9)   |
| <b>Bushtit</b>                   | <i>Psaltiriparus minimus</i>      | 0.36 (12)  | 0.00 (0)   | 0.19 (12)  |
| <b>Red-breasted Nuthatch</b>     | <i>Sitta canadensis</i>           | 0.15 (5)   | 0.00 (0)   | 0.08 (5)   |
| <b>White-breasted Nuthatch</b>   | <i>Sitta carolinensis</i>         | 0.12 (4)   | 0.13 (4)   | 0.13 (8)   |
| <b>Brown Creeper</b>             | <i>Certhia americana</i>          | 0.03 (1)   | 0.33 (10)  | 0.17 (11)  |
| <b>House Wren</b>                | <i>Troglodytes aedon</i>          | 0.03 (1)   | 0.33 (10)  | 0.17 (11)  |
| <b>Pacific Wren</b>              | <i>Troglodytes pacificus</i>      | 0.03 (1)   | 0.10 (3)   | 0.06 (4)   |
| <b>Bewick's Wren</b>             | <i>Thryomanes bewickii</i>        | 0.33 (11)  | 0.00 (0)   | 0.17 (11)  |
| <b>Golden-crowned Kinglet</b>    | <i>Regulus satrapa</i>            | 0.03 (1)   | 0.03 (1)   | 0.03 (2)   |
| <b>Ruby-crowned Kinglet</b>      | <i>Regulus calendula</i>          | 0.03 (1)   | 0.00 (0)   | 0.02 (1)   |
| <b>Western Bluebird</b>          | <i>Sialia mexicana</i>            | 0.06 (2)   | 0.72 (22)  | 0.38 (24)  |
| <b>Mountain Bluebird</b>         | <i>Sialia currucoides</i>         | 0.03 (1)   | 0.00 (0)   | 0.02 (1)   |
| <b>Swainson's Thrush</b>         | <i>Catharus ustulatus</i>         | 0.24 (8)   | 0.29 (9)   | 0.27 (17)  |
| <b>Hermit Thrush</b>             | <i>Catharus guttatus</i>          | 0.00 (0)   | 0.07 (2)   | 0.03 (2)   |
| <b>American Robin</b>            | <i>Turdus migratorius</i>         | 4.92 (162) | 4.42 (135) | 4.68 (297) |
| <b>Varied Thrush</b>             | <i>Ixoreus naevius</i>            | 0.67 (22)  | 0.33 (10)  | 0.50 (32)  |
| <b>European Starling</b>         | <i>Sturnus vulgaris</i>           | 8.47 (279) | 5.31 (162) | 7.00 (441) |
| <b>Cedar Waxwing</b>             | <i>Bombycilla cedrorum</i>        | 1.55 (51)  | 0.92 (28)  | 1.25 (79)  |
| <b>House Sparrow</b>             | <i>Passer domesticus</i>          | 2.88 (95)  | 2.33 (71)  | 2.62 (166) |
| <b>Evening Grosbeak</b>          | <i>Coccothraustes vespertinus</i> | 0.33 (11)  | 0.03 (1)   | 0.19 (12)  |
| <b>House Finch</b>               | <i>Haemorhous mexicanus</i>       | 2.16 (71)  | 1.31 (40)  | 1.75 (111) |
| <b>Purple Finch</b>              | <i>Haemorhous purpureus</i>       | 0.06 (2)   | 0.13 (4)   | 0.09 (6)   |
| <b>Cassin's Finch</b>            | <i>Haemorhous cassinii</i>        | 0.00 (0)   | 0.16 (5)   | 0.08 (5)   |
| <b>Pine Siskin</b>               | <i>Spinus pinus</i>               | 1.37 (45)  | 0.82 (25)  | 1.10 (70)  |
| <b>Lesser Goldfinch</b>          | <i>Spinus psaltria</i>            | 0.06 (2)   | 1.80 (55)  | 0.90 (57)  |
| <b>American Goldfinch</b>        | <i>Spinus tristis</i>             | 1.82 (60)  | 0.33 (10)  | 1.10 (70)  |
| <b>Chipping Sparrow</b>          | <i>Spizella passerina</i>         | 0.03 (1)   | 0.00 (0)   | 0.02 (1)   |
| <b>Fox Sparrow</b>               | <i>Passerella iliaca</i>          | 0.49 (16)  | 0.46 (14)  | 0.47 (30)  |
| <b>American Tree Sparrow</b>     | <i>Spizelloides arborea</i>       | 0.03 (1)   | 0.00 (0)   | 0.02 (1)   |
| <b>Dark-eyed Junco</b>           | <i>Junco hyemalis</i>             | 1.00 (33)  | 1.08 (33)  | 1.04 (66)  |
| <b>White-crowned Sparrow</b>     | <i>Zonotrichia leucophrys</i>     | 0.06 (2)   | 0.10 (3)   | 0.08 (5)   |
| <b>Golden-crowned Sparrow</b>    | <i>Zonotrichia atricapilla</i>    | 0.15 (5)   | 0.26 (8)   | 0.20 (13)  |
| <b>White-throated Sparrow</b>    | <i>Zonotrichia albicollis</i>     | 0.00 (0)   | 0.03 (1)   | 0.02 (1)   |
| <b>Vesper Sparrow</b>            | <i>Poocetes gramineus</i>         | 0.00 (0)   | 0.03 (1)   | 0.02 (1)   |

|                                |                                  |            |            |            |
|--------------------------------|----------------------------------|------------|------------|------------|
| <b>Savannah Sparrow</b>        | <i>Passerculus sandwichensis</i> | 0.00 (0)   | 0.03 (1)   | 0.02 (1)   |
| <b>Song Sparrow</b>            | <i>Melospiza melodia</i>         | 2.00 (66)  | 0.39 (12)  | 1.23 (78)  |
| <b>Lincoln's Sparrow</b>       | <i>Melospiza lincolnii</i>       | 0.00 (0)   | 0.07 (2)   | 0.03 (2)   |
| <b>Spotted Towhee</b>          | <i>Pipilo maculatus</i>          | 1.43 (47)  | 1.05 (32)  | 1.25 (79)  |
| <b>Yellow-breasted Chat</b>    | <i>Icteria virens</i>            | 0.00 (0)   | 0.07 (2)   | 0.03 (2)   |
| <b>Western Meadowlark</b>      | <i>Sturnella neglecta</i>        | 0.00 (0)   | 0.07 (2)   | 0.03 (2)   |
| <b>Bullock's Oriole</b>        | <i>Icterus bullockii</i>         | 0.00 (0)   | 0.16 (5)   | 0.08 (5)   |
| <b>Red-winged Blackbird</b>    | <i>Agelaius phoeniceus</i>       | 0.00 (0)   | 0.20 (6)   | 0.09 (6)   |
| <b>Brown-headed Cowbird</b>    | <i>Molothrus ater</i>            | 0.06 (2)   | 0.49 (15)  | 2.68 (17)  |
| <b>Brewer's Blackbird</b>      | <i>Euphagus cyanocephalus</i>    | 0.79 (26)  | 0.98 (30)  | 0.88 (56)  |
| <b>Golden-winged Warbler</b>   | <i>Vermivora chrysoptera</i>     | 0.00 (0)   | 0.03 (1)   | 0.02 (1)   |
| <b>Orange-crowned Warbler</b>  | <i>Leiothlypis celata</i>        | 0.03 (1)   | 0.03 (1)   | 0.03 (2)   |
| <b>MacGillivray's Warbler</b>  | <i>Geothlypis tolmiei</i>        | 0.00 (0)   | 0.07 (2)   | 0.03 (2)   |
| <b>Common Yellowthroat</b>     | <i>Geothlypis trichas</i>        | 0.03 (1)   | 0.03 (1)   | 0.03 (2)   |
| <b>Yellow-rumped Warbler</b>   | <i>Setophaga coronata</i>        | 0.06 (2)   | 0.07 (2)   | 0.06 (4)   |
| <b>Yellow-throated Warbler</b> | <i>Setophaga dominica</i>        | 0.00 (0)   | 0.03 (1)   | 0.02 (1)   |
| <b>Wilson's Warbler</b>        | <i>Cardellina pusilla</i>        | 0.03 (1)   | 0.03 (1)   | 0.03 (2)   |
| <b>Western Tanager</b>         | <i>Piranga ludoviciana</i>       | 0.09 (3)   | 0.92 (28)  | 0.49 (31)  |
| <b>Black-headed Grosbeak</b>   | <i>Pheucticus melanocephalus</i> | 0.09 (3)   | 1.74 (53)  | 0.88 (56)  |
| Total                          |                                  | 100 (3293) | 100 (3052) | 100 (6345) |

**Table S2.** Names and characteristics of bird species included in this study. Body masses are average adult masses from Dunning (2008). Residency is classified as *migrant* for species spending only part of the year in western Oregon or *year-round* for species present in all months, even though many of those species migrate. Species that forage on or near the ground (expected to be within routine reach of cats) are indicated with Yes in the Terrestrial column; those normally found well above the ground are indicated with No. Some non-terrestrial species (e.g., finches) may forage on the ground occasionally, particularly near bird feeders. Species regularly attending bird feeders are indicated.

| <b>Species</b>         | <b>Body mass (g)</b> | <b>Residency</b> | <b>Terrestrial</b> | <b>Feeder</b> |
|------------------------|----------------------|------------------|--------------------|---------------|
| Canada Goose           | 3800-4800            | Year-round       | Yes                | No            |
| Wood Duck              | 681                  | Year-round       | Yes                | No            |
| Mallard                | 1095-1246            | Year-round       | Yes                | No            |
| California Quail       | 162-186              | Year-round       | Yes                | Yes           |
| Wild Turkey            | 4000-8000            | Year-round       | Yes                | Yes           |
| Rock Pigeon            | 340-369              | Year-round       | Yes                | Yes           |
| Eurasian Collared-Dove | 146-152              | Year-round       | Yes                | Yes           |
| Mourning Dove          | 115-123              | Year-round       | Yes                | Yes           |
| Common Poorwill        | 48                   | Migrant          | Yes                | No            |
| Vaux's Swift           | 17                   | Migrant          | No                 | No            |
| Anna's Hummingbird     | 4.5                  | Year-round       | No                 | Yes           |
| Rufous Hummingbird     | 3.5                  | Migrant          | No                 | Yes           |
| Virginia Rail          | 69-89                | Migrant          | Yes                | No            |
| American Coot          | 650                  | Year-round       | Yes                | No            |
| Western Gull           | 1050                 | Year-round       | Yes                | No            |
| Green Heron            | 212                  | Migrant          | Yes                | No            |
| Cooper's Hawk          | 349-529              | Year-round       | No                 | No            |

|                              |         |            |     |     |
|------------------------------|---------|------------|-----|-----|
| Red-shouldered Hawk          | 544-670 | Year-round | No  | No  |
| Barn Owl                     | 474-566 | Year-round | No  | No  |
| Western Screech-Owl          | 192-236 | Year-round | No  | No  |
| Northern Saw-whet Owl        | 101-167 | Year-round | No  | No  |
| Acorn Woodpecker             | 80      | Year-round | No  | Yes |
| <i>Sphyrapicus</i> Sapsucker | 55      | Year-round | No  | Yes |
| Downy Woodpecker             | 27      | Year-round | No  | Yes |
| Hairy Woodpecker             | 79      | Year-round | No  | Yes |
| Northern Flicker             | 142     | Year-round | Yes | Yes |
| Pileated Woodpecker          | 266-308 | Year-round | No  | No  |
| American Kestrel             | 111-120 | Year-round | No  | No  |
| Peregrine Falcon             | 652-977 | Migrant    | No  | No  |
| Prairie Falcon               | 560-908 | Migrant    | Yes | No  |
| Ash-throated Flycatcher      | 28      | Migrant    | No  | No  |
| Pacific-slope Flycatcher     | 10      | Migrant    | No  | No  |
| Steller's Jay                | 128     | Year-round | Yes | Yes |
| California Scrub-Jay         | 73-80   | Year-round | Yes | Yes |
| American Crow                | 376-423 | Year-round | Yes | Yes |
| Tree Swallow                 | 21      | Migrant    | No  | No  |
| Violet-green Swallow         | 14      | Migrant    | No  | No  |
| Barn Swallow                 | 16      | Migrant    | No  | No  |
| Cliff Swallow                | 21      | Migrant    | No  | No  |
| Black-capped Chickadee       | 11      | Year-round | No  | Yes |
| Bushtit                      | 5       | Year-round | No  | Yes |
| Red-breasted Nuthatch        | 10      | Year-round | No  | Yes |
| White-breasted Nuthatch      | 21      | Year-round | No  | Yes |
| Brown Creeper                | 8       | Year-round | No  | No  |
| House Wren                   | 10      | Migrant    | Yes | No  |
| Pacific Wren                 | 9       | Year-round | Yes | No  |
| Bewick's Wren                | 10      | Year-round | Yes | Yes |
| Golden-crowned Kinglet       | 6       | Migrant    | No  | No  |
| Western Bluebird             | 26      | Year-round | Yes | Yes |
| Swainson's Thrush            | 0       | 3 Migrant  | Yes | No  |
| American Robin               | 78      | Year-round | Yes | No  |
| Varied Thrush                | 79      | Migrant    | Yes | Yes |
| European Starling            | 85      | Year-round | Yes | Yes |
| Cedar Waxwing                | 31      | Migrant    | No  | No  |
| House Sparrow                | 28      | Year-round | Yes | Yes |
| Evening Grosbeak             | 60      | Migrant    | No  | Yes |
| House Finch                  | 21      | Year-round | No  | Yes |
| Purple Finch                 | 23      | Year-round | No  | Yes |
| Pine Siskin                  | 12      | Migrant    | No  | Yes |

|                        |        |            |     |     |
|------------------------|--------|------------|-----|-----|
| Lesser Goldfinch       | 9.5    | Year-round | No  | Yes |
| American Goldfinch     | 13     | Year-round | No  | Yes |
| Fox Sparrow            | 35     | Migrant    | Yes | Yes |
| Dark-eyed Junco        | 20     | Year-Round | Yes | Yes |
| Golden-crowned Sparrow | 32     | Migrant    | Yes | Yes |
| Vesper Sparrow         | 24     | Migrant    | Yes | No  |
| Song Sparrow           | 20     | Year-round | Yes | Yes |
| Spotted Towhee         | 39     | Year-round | Yes | Yes |
| Western Meadowlark     | 89-112 | Year-round | Yes | No  |
| Red-winged Blackbird   | 39-65  | Year-round | Yes | Yes |
| Brown-headed Cowbird   | 37-47  | Migrant    | Yes | Yes |
| Brewer's Blackbird     | 58-67  | Year-round | Yes | Yes |
| Orange-crowned Warbler | 9      | Migrant    | No  | Yes |
| MacGillivray's Warbler | 10     | Migrant    | Yes | No  |
| Common Yellowthroat    | 10     | Migrant    | Yes | No  |
| Yellow-rumped Warbler  | 12     | Migrant    | No  | Yes |
| Wilson's Warbler       | 7      | Migrant    | No  | No  |
| Western Tanager        | 28     | Migrant    | No  | No  |
| Black-headed Grosbeak  | 42     | Migrant    | No  | Yes |

**Table S3.** Table of all species with at least one cat interaction record at a wildlife rehabilitation center and the percentage (N) of records occurring in urban, rural and unknown (inadequate address designation) habitats.

| Species                | Turtle Ridge |          |          | Wildlife Images |          |           |
|------------------------|--------------|----------|----------|-----------------|----------|-----------|
|                        | Urban        | Rural    | Unknown  | Urban           | Rural    | Unknown   |
| Canada Goose           | -            | -        | -        | 0 (0)           | 50 (1)   | 50 (1)    |
| Wood Duck              | -            | -        | -        | 0 (0)           | 100 (5)  | 0 (0)     |
| Mallard                | 100 (5)      | 0 (0)    | 0 (0)    | 28.6 (2)        | 57.1 (4) | 14.3 (1)  |
| California Quail       | -            | -        | -        | 12.5 (1)        | 87.5 (7) | 0 (0)     |
| Wild Turkey            | 0 (0)        | 100 (2)  | 0 (0)    | 0 (0)           | 40 (2)   | 60 (3)    |
| Rock Pigeon            | 100 (6)      | 0 (0)    | 0 (0)    | 57.1 (4)        | 0 (0)    | 42.9 (3)  |
| Eurasian Collared-Dove | 60.9 (14)    | 21.7 (5) | 17.4 (4) | 47.8 (11)       | 30.4 (7) | 21.7 (5)  |
| Mourning Dove          | 68 (17)      | 24 (6)   | 8 (2)    | 53.3 (16)       | 30 (9)   | 16.7 (5)  |
| Common Poorwill        | -            | -        | -        | 50 (1)          | 50 (1)   | 0 (0)     |
| Vaux's Swift           | 100 (3)      | 0 (0)    | 0 (0)    | -               | -        | -         |
| Anna's Hummingbird     | 70 (7)       | 20 (2)   | 10 (1)   | 66.7 (2)        | 33.3 (1) | 0 (0)     |
| Rufous Hummingbird     | 100 (1)      | 0 (0)    | 0 (0)    | 33.3 (3)        | 33.3 (3) | 33.33 (3) |
| Virginia Rail          | -            | -        | -        | 0 (0)           | 100 (1)  | 0 (0)     |
| American Coot          | -            | -        | -        | 100 (1)         | 0 (0)    | 0 (0)     |
| Western Gull           | 0 (0)        | 0 (0)    | 100 (1)  | -               | -        | -         |
| Green Heron            | 0 (0)        | 100 (2)  | 0 (0)    | 75 (3)          | 25 (1)   | 0 (0)     |
| Cooper's Hawk          | 100 (1)      | 0 (0)    | 0 (0)    | 100 (1)         | 0 (0)    | 0 (0)     |
| Red-shouldered Hawk    | -            | -        | -        | 50 (1)          | 0 (0)    | 50 (1)    |
| Barn Owl               | -            | -        | -        | 0 (0)           | 0 (0)    | 100 (1)   |
| Western Screech-Owl    | -            | -        | -        | 50 (4)          | 50 (4)   | 0 (0)     |
| Northern Saw-whet Owl  | -            | -        | -        | 0 (0)           | 100 (2)  | 0 (0)     |
| Acorn Woodpecker       | 100 (1)      | 0 (0)    | 0 (0)    | 20 (2)          | 70 (7)   | 10 (1)    |

|                          |              |           |          |           |           |           |
|--------------------------|--------------|-----------|----------|-----------|-----------|-----------|
| Sapsuckers               | 100 (5)      | 0 (0)     | 0 (0)    | 0 (0)     | 66.7 (2)  | 33.3 (1)  |
| Downy Woodpecker         | 0 (0)        | 100 (1)   | 0 (0)    | -         | -         | -         |
| Hairy Woodpecker         | -            | -         | -        | 0 (0)     | 100 (3)   | 0 (0)     |
| Northern Flicker         | 76.9 (10)    | 15.4 (2)  | 7.7 (1)  | 45.5 (5)  | 54.5 (6)  | 0 (0)     |
| Pileated Woodpecker      | -            | -         | -        | 0 (0)     | 100 (1)   | 0 (0)     |
| American Kestrel         | 100 (2)      | 0 (0)     | 0 (0)    | -         | -         | -         |
| Peregrine Falcon         | -            | -         | -        | 0 (0)     | 100 (1)   | 0 (0)     |
| Prairie Falcon           | -            | -         | -        | 0 (0)     | 0 (0)     | 100 (1)   |
| Ash-throated Flycatcher  | -            | -         | -        | 0 (0)     | 100 (1)   | 0 (0)     |
| Pacific-slope Flycatcher | 75 (3)       | 25 (1)    | 0 (0)    | -         | -         | -         |
| Steller's Jay            | 88.9 (8)     | 11.1 (1)  | 0 (0)    | 33.3 (3)  | 66.7 (6)  | 0 (0)     |
| California Scrub-Jay     | 84.9 (45)*** | 15.1 (8)  | 0 (0)    | 51.2 (21) | 22.0 (9)  | 26.8 (11) |
| American Crow            | 100 (12)     | 0 (0)     | 0 (0)    | 50 (3)    | 50 (3)    | 0 (0)     |
| Tree Swallow             | 100 (1)      | 0 (0)     | 0 (0)    | 0 (0)     | 100 (2)   | 0 (0)     |
| Violet-green Swallow     | 80 (4)       | 20 (1)    | 0 (0)    | -         | -         | -         |
| Barn Swallow             | 66.7 (2)     | 33.3 (1)  | 0 (0)    | -         | -         | -         |
| Cliff Swallow            | 0 (0)        | 0 (0)     | 100 (1)  | -         | -         | -         |
| Black-capped Chickadee   | 77.8 (7)     | 11.1 (1)  | 11.1 (1) | 75 (3)    | 25 (1)    | 0 (0)     |
| Bushtit                  | 66.7 (2)     | 0 (0)     | 33.3 (1) | -         | -         | -         |
| Red-breasted Nuthatch    | 100 (1)      | 0 (0)     | 0 (0)    | -         | -         | -         |
| White-breasted Nuthatch  | 100 (1)      | 0 (0)     | 0 (0)    | -         | -         | -         |
| Brown Creeper            | -            | -         | -        | 0 (0)     | 100 (1)   | 0 (0)     |
| House Wren               | -            | -         | -        | 0 (0)     | 100 (1)   | 0 (0)     |
| Pacific Wren             | -            | -         | -        | 0 (0)     | 100 (2)   | 0 (0)     |
| Bewick's Wren            | 100 (2)      | 0 (0)     | 0 (0)    | -         | -         | -         |
| Golden-crowned Kinglet   | 100 (1)      | 0 (0)     | 0 (0)    | -         | -         | -         |
| Western Bluebird         | -            | -         | -        | 33.3 (2)  | 66.7 (4)  | 0 (0)     |
| Swainson's Thrush        | 0 (0)        | 66.7 (2)  | 33.3 (1) | 100 (1)   | 0 (0)     | 0 (0)     |
| American Robin           | 67.4 (31)    | 28.3 (13) | 4.3 (2)  | 54.5 (24) | 31.8 (14) | 13.6 (6)  |
| Varied Thrush            | 63.6 (7)     | 36.4 (4)  | 0 (0)    | 0 (0)     | 50 (2)    | 50 (2)    |
| European Starling        | 78.6 (22)**  | 17.9 (5)  | 3.6 (1)  | 83.3 (10) | 8.3 (1)   | 8.3 (1)   |
| Cedar Waxwing            | 60 (3)       | 20 (1)    | 20 (1)   | 66.7 (2)  | 0 (0)     | 33.3 (1)  |
| House Sparrow            | 80 (12)      | 6.7 (1)   | 13.3 (2) | 70 (7)    | 30 (3)    | 0 (0)     |
| Evening Grosbeak         | 50 (2)       | 50 (2)    | 0 (0)    | -         | -         | -         |
| House Finch              | 80 (8)       | 20 (2)    | 0 (0)    | 83.3 (5)  | 16.7 (1)  | 0 (0)     |
| Purple Finch             | 50 (1)       | 50 (1)    | 0 (0)    | -         | -         | -         |
| Pine Siskin              | 57.1 (4)     | 0 (0)     | 42.9 (3) | 25 (1)    | 75 (3)    | 0 (0)     |
| Goldfinches              | 83.3 (5)     | 0 (0)     | 16.7 (6) | 80 (8)    | 10 (1)    | 10 (1)    |
| Fox Sparrow              | 66.7 (6)     | 33.3 (3)  | 0 (0)    | 0 (0)     | 50 (2)    | 50 (2)    |
| Dark-eyed Junco          | 50 (8)       | 43.8 (7)  | 6.3 (1)  | 50 (4)    | 12.5 (1)  | 37.5 (3)  |
| Golden-crowned Sparrow   | 100 (1)      | 0 (0)     | 0 (0)    | 50 (2)    | 25 (1)    | 25 (1)    |
| Vesper Sparrow           | -            | -         | -        | 0 (0)     | 100 (1)   | 0 (0)     |
| Song Sparrow             | 55.6 (5)     | 33.3 (3)  | 11.1 (1) | 0 (0)     | 100 (1)   | 0 (0)     |
| Spotted Towhee           | 40 (8)       | 55 (11)   | 5 (1)    | 0 (0)     | 75 (9)++  | 25 (3)    |
| Western Meadowlark       | -            | -         | -        | -         | 100 (1)   | 0 (0)     |
| Red-winged Blackbird     | -            | -         | -        | 0 (0)     | 50 (1)    | 50 (1)    |
| Brown-headed Cowbird     | 0 (0)        | 0 (0)     | 100 (1)  | -         | -         | -         |
| Brewer's Blackbird       | 33.3 (1)     | 66.7 (2)  | 0 (0)    | 0 (0)     | 0 (0)     | 100 (1)   |

|                        |         |         |       |          |          |          |
|------------------------|---------|---------|-------|----------|----------|----------|
| Orange-crowned Warbler | 100 (1) | 0 (0)   | 0 (0) | -        | -        | -        |
| MacGillivray's Warbler | -       | -       | -     | 0 (0)    | 100 (1)  | 0 (0)    |
| Common Yellowthroat    | 0 (0)   | 100 (1) | 0 (0) | 0 (0)    | 100 (1)  | 0 (0)    |
| Yellow-rumped Warbler  | -       | -       | -     | 100 (1)  | 0 (0)    | 0 (0)    |
| Wilson's Warbler       | -       | -       | -     | 100 (1)  | 0 (0)    | 0 (0)    |
| Western Tanager        | 50 (1)  | 50 (1)  | 0 (0) | 25 (1)   | 75 (3)   | 0 (0)    |
| Black-headed Grosbeak  | 100 (2) | 0 (0)   | 0 (0) | 27.3 (3) | 54.5 (6) | 18.2 (2) |

Chi-squared test: \*  $p < 0.05$ , \*\*  $p < 0.01$ , \*\*\*  $p < 0.001$

Fisher's Exact †  $p < 0.05$ , ††  $p < 0.01$ , †††  $p < 0.001$
